# Supplementary material
Source: MDPI journal article supplement (https://www.mdpi.com/2311-7524/8/2/121)
Supplement: s1 [file s1]

**Table S1.** Composition of ER medium.

| Component                              | Final concentration (mg/L) |
|----------------------------------------|----------------------------|
| Ca(NO <sub>3</sub> ).4H <sub>2</sub> O | 600.0                      |
| NH <sub>4</sub> NO <sub>3</sub>        | 360.0                      |
| KNO <sub>3</sub>                       | 160.0                      |
| MgSO <sub>4</sub> .7H <sub>2</sub> O   | 750.0                      |
| NaSO <sub>4</sub>                      | 200.0                      |
| NaH <sub>2</sub> PO <sub>4</sub>       | 19.0                       |
| MnSO <sub>4</sub> .H <sub>2</sub> O    | 3.0                        |
| H <sub>3</sub> BO <sub>3</sub>         | 0.5                        |
| ZnSO <sub>4</sub> .7H <sub>2</sub> O   | 0.5                        |
| CoCl <sub>2</sub> .6H <sub>2</sub> O   | 0.025                      |
| CuSO <sub>4</sub> .5H <sub>2</sub> O   | 0.025                      |
| NaMoO <sub>4</sub> .2H <sub>2</sub> O  | 0.025                      |
| Ca·Panthothenate                       | 0.25                       |
| Myo-Inositol                           | 50                         |
| VB1                                    | 0.25                       |
| VB6                                    | 0.25                       |
| Glycine                                | 3.0                        |
| Cysteine                               | 1211.6                     |
| CH                                     | 50.0                       |
| Iron Citrate                           | 10.0                       |
